# Supplementary material for: Facilitators and Barriers in the Implementation of Community Health Workers-Led Multicomponent Intervention to Control Hypertension at Selected Health Centers in Rwanda: Qualitative Research
Source: Research Square preprint supplement (doi:10.21203/rs.3.rs-7387708/v1), 2025-09-01
Supplement: Supplementary file 1 [file 1a9aead935935516cd75a3e9.docx]

**IN-DEPTH INTERVIEW Guide-English version**

Good morning, my name is MWISENEZA Innocent.

This interview is being conducted to get your input about the implementation of CHWs-led MCI in supporting the control of HTN among hypertensive patients attending Rwanda health centers. We are going to ask some questions that are related to “barriers and facilitators to CHWs-Led MCI to control HTN”.

I am especially interested in any inputs, problems you have faced or are aware of, and recommendations you have regarding the above-mentioned research topic. If it is okay with you, I will be tape-recording our conversation. The purpose of this is so that I can get all the details, but at the same time be able to carry on an attentive conversation with you. I assure you that all your comments will remain confidential. I will be compiling a report that will contain all participants’ comments without any reference to individuals. If you agree to this interview and the tape recording, please sign the consent form.

I'd like to start by having you briefly describe yourself and your position in research (Hypertensive patient, CHWs, health center nurse, health center manager, or any other key informant). (To the interviewer: You may need to probe to get your information).

"I'm now going to ask you some questions that I would like you to answer to the best of your ability. If you do not know the answer, please say so."

1. “What do you know about hypertension? Do you think the knowledge you have can affect the way you behave towards its management?" (*Note to interviewer: If so, probe - "What have the problems been?", "Do you know why these problems are occurring?", "Do you have any suggestions on how to minimize these problems?"*

2."Do you think HTN awareness may be contributing to its control? What do you think about barriers and motivators that may be related to HTN control in your context?"*(Note to interviewer: You may need to probe to gather participant reactions, etc.)*

3. “What can you tell us about taking a healthy diet as recommended by HCPs/CHWs? What can you say about the possible barriers you encounter, and enumerate them if any? What can you say about motivators and enumerate them if any?" *(Note to interviewer: After giving individual time to respond, probe specific planned activities/strategies he/she may not have addressed.)*

4." Do you do physical activities regularly as recommended by CHWs/HCPs? What do you think is a constraint or motivator in your physical activity habit?" *(Note to interviewer: You may need to probe why specific strong elements are mentioned - e.g., if interviewee replies "They work", respond "How can you tell that they work?")*

5." Do you think the duration of hypertensive medication may be one of the barriers or motivators in the control of HTN?" *(Note to interviewer: You may need to probe to gather the information you need).*

6." What can you say about the number of pills you take and how often you take them? Does it affect the way you take your medication?" *(Note to interviewer: You may need to probe to gather the information you need).*

7." What do you think about the care you receive regarding hypertension? Is the service affordable? Explain?"*(Note to interviewer: You may need to probe to gather the information you need - e.g., "I'd like to know more about what your thinking is on that issue").*

8." What can you say about the accessibility of hypertension services at health center level? Do you think the service is easily accessible? Explain?" *(Note to interviewer: If so, you may need to probe to gather the information you need).*

**FOCUS GROUP DISCUSSION Guide-English version**

Good morning. My name is MWISENEZA Innocent.

This group discussion is being conducted to get your inputs about the implementation of CHWs-led MCI in supporting the control of HTN among hypertensive patients attending Rwanda health centers. Where we are going to ask some questions which are related to “barriers and facilitators to CHWs-Led MCI to control HTN”.

I am especially interested in any inputs, problems you have faced or are aware of and recommendations you have regarding the above mentioned research topic. If it is okay with you, I will be tape-recording our conversation. The purpose of this is so that I can get all the details but at the same time be able to carry on an attentive conversation with you. I assure you that all your comments will remain confidential. I will be compiling a report which will contain all participants’ comments without any reference to individuals. If you agree to this interview and the tape recording, please sign the consent form.

I'd like to start by having you briefly describe yourself. (To the interviewer: you may need to probe in order to get your information).

1. What is hypertension? What do you know about hypertension? Do you think the knowledge you have can affect the way you behave towards its management?"

2."Do you think HTN awareness may be contributing factor to its control? What do you think about barriers and motivators that may be related to HTN control according to your opinion?"

3. “What can you tell us about taking a healthy diet as recommended by HCPs/CHWs? What can you say about the possible barriers you encounter and enumerate them if any? What can you say about motivators and enumerate them if any?"

4." Do you do physical activities regularly as recommended by CHWs/HCPs? What do you think is a constraint or motivator in your physical activity habit?"

5." Do you think the duration of hypertensive medication may be one of the barriers or motivators in the control of HTN?"

6." What can you say about the number of pills you take and how often you take them? Does it affect the way you take your medication?"

7." What do you think about the care you receive regarding hypertension? Is the service affordable? Explain?”

8." What can you say about the accessibility of hypertension services at health center level? Do you think the service is easily accessible? Explain?”

**KEY INFORMANT INTERVIEW Guide-English version**

**FOR HEALTH CENTER MANAGERS**

1. Tell me about yourself, (Your names, age, sex, function)?

2. Tell me about your involvement in management of hypertension among uncontrolled hypertension patients attending this health

Who have your efforts been focused on? Who have you, and can you reach?

What types of activities have you been involved in regarding management of HTN?

Who have you collaborated with regarding to the above mentioned issues?

3. Do you think the knowledge on HTN can affect the way it can be managed?

4."Do you think HTN awareness may be contributing factor to its control? What do you think about barriers and motivators that may be related to HTN control according to your opinion?"

Tell me about barriers?(On managers, nurse CHWs and patients if any)

Tell me about motivators?( On managers, nurse CHWs and patients if any)

5. “What can you tell us about taking a healthy diet as recommended by Ministry of health? What barriers and or motivators can be encountered during the implementation of this recommended this to the patients?

6." What can you tell me about practicing physical activities regularly as recommended by Ministry of health? What barriers and or motivators can be encountered during the implementation of this recommended practice to the patients?

7." Do you think the duration of hypertensive medication may be one of the barriers or motivators in the control of HTN?"

8." What can you say about the number of pills patients take and how often you take them? Does it affect the way they take their HTN medications?"

9." What do you think about the care you provide to hypertensive patients? Is the service affordable? Explain?”

9." What can you say about the accessibility of hypertension services at health center level? Do you think the service is easily accessible? Explain?”

**FOR NURSES AT HEALTH CENTER NCD CLINIC**

1. Tell me about yourself, (Your names, age, sex, function)?

2. Tell me about your involvement in management of hypertension among uncontrolled hypertension patients attending this health

Who have your efforts been focused on? Who have you, and can you reach?

What types of activities have you been involved in regarding management of HTN?

Who have you collaborated with regarding to the above mentioned issues

3. Do you think the knowledge on HTN can affect the way it can be managed?"

2."Do you think HTN awareness may be contributing factor to its control? What do you think about barriers and motivators that may be related to HTN control according to your opinion?"

Tell me about barriers?(Nurse CHWs and patients if any)

Tell me about motivators?(Nurse CHWs and patients if any)

4. “What can you tell us about taking a healthy diet as recommended by Ministry of health? What barriers and or motivators can be encountered during the implementation of this recommended this to the patients?

5." What can you tell me about practicing physical activities regularly as recommended by Ministry of health? What barriers and or motivators can be encountered during the implementation of this recommended practice to the patients?

6." Do you think the duration of hypertensive medication may be one of the barriers or motivators in the control of HTN?"

7." What can you say about the number of pills patients take and how often you take them? Does it affect the way they take their HTN medications?"

8." What do you think about the care you provide to hypertensive patients? Is the service affordable? Explain?”

9." What can you say about the accessibility of hypertension services at health center level? Do you think the service is easily accessible? Explain?”

**FOR COMMUNITY HEALTH WORKERS (CHWS)**

1. Tell me about yourself, (Your names, age, sex, function)?

2. Tell me about your involvement in management of hypertension among uncontrolled hypertension patients attending in the community

Who have your efforts been focused on? Who have you, and can you reach?

What types of activities have you been involved in regarding management of HTN?

Who have you collaborated with regarding to the above mentioned issues

Do you think, as a community health worker your role plays a significant role in the management of uncontrolled HTN?

3. Do you think the knowledge on HTN can affect the way it can be managed?"

2."Do you think HTN awareness may be contributing factor to its control? What do you think about barriers and motivators that may be related to HTN control according to your opinion?"

Tell me about barriers?(CHWs and patients if any)

Tell me about motivators?(CHWs and patients if any)

4. “What can you tell us about taking a healthy diet as recommended by HCP? What barriers and or motivators can be encountered during the implementation of this recommended this to the patients?

5." What can you tell me about practicing physical activities regularly as recommended by HCP? What barriers and or motivators can be encountered during the implementation of this recommended practice to the patients?

6." Do you think the duration of hypertensive medication may be one of the barriers or motivators in the control of HTN?"

7." What can you say about the number of pills patients take and how often you take them? Does it affect the way they take their HTN medications?"

8." What do you think the care provided to hypertensive patients can play a role in its management? Is the service affordable to you? Explain?”

9." What can you say about the accessibility of hypertension services at health center level? Do you think the service is easily accessible? Explain?”

## **PARTICIPANT INFORMATION SHEET (PIS)-English version**

**What is the purpose of the study?**

The studywill evaluate the “**community health workers-led multicomponent intervention for hypertension control: a cluster randomized controlled trial in Rwanda** in Non-communicable diseases (NCD) clinics (‘standard of care’).

**Who is organising and funding the study?**

The study will be conducted and financed by the principal investigators together with the co-investigators from the School of Public, University of Rwanda. The investigators are still searching for further financial means to facilitate the smooth conduction of this research.

**Why have I been invited?**

You have been invited because you are qualified among the study population who are people with uncontrolled hypertension attending Rwanda health centers. Your participation will help to evaluate the effectiveness of CHW-led MCI in the management of HTN among patients with uncontrolled HTN.

**Do I have to take part?**

Ideally, participating, or not participating, will have no bearing on routine hypertensive management and the names of those who decide to participate will not be forwarded to implementing partners. It is up to you to decide whether or not to take part in this study. We will describe the study and go through this information sheet. If you agree to participate, we will ask you to sign a consent form.

**What will I have to do if I take part?**

If you decide to take part in this study, you will be asked to be followed for 12-month period and you will be explained more about your allocation group just after signing a consent form. After you consent, you will be enrolled and we shall gather information on socio-demographic, and other factors based on the objective of this study.

**What are the possible benefits of taking part?**

There are potential direct benefits for your participation for being enrolled in this study, as those selected will be to have uncontrolled HTN will be linked to timely care and others followed up routinely for medical treatment from either their health center and/or CHW intervention to the end of this research. The study will benefit healthcare providers (nurses, and community health workers) as will be a great learning opportunity to better understand the management of uncontrolled HTN and improve the quality of care delivered to the hypertensive patients

**Are there any possible disadvantages or risks of taking part?**

This study is unlikely to cause undesirable consequences. If you decide not to take part, your management will not be affected in any way as regards routine care. You have the right to at any time during the study withdraw and not take part. This will not affect the routine health care that you will receive.

**What about confidentiality?**

We will not be sharing information about you to anyone outside of the research team. The information that we collect from this research will be kept private. Any information about you will have a number on it instead of your name. Only the researchers will know what your number is and we will lock that information up with a lock and key. It will not be shared with or given to anyone except research team.

**What will happen if I don’t want to carry on with the study?**

You are free to withdraw at any time without giving a reason. You may withdraw your information from the study at any time until the data have been combined with that of the other participants. If you decide to withdraw or not to join the study, this will not affect any service you may be receiving. Study participants will be discontinued from participation in the study if any adverse effect or situation occurs during the 12 months intervention or is in the best interest of the participant not to be included.

**What if there is a problem?**

We do not expect that any problem will occur during the study. However, if you do have any concerns about any aspect of this study or complaints about the way you have been treated during the study or possible harm you might suffer, please ask to speak to our team’s contact details are provided at the end of this sheet*.*

**Insurance**

Health insurance for study participants will not be covered for the low risk of the intervention. However, in case any health issues occur, participants will be followed up and treatment provided according to standard hypertensive patient management until the problems have resolved.

**What will happen to the results of the research study?**

The results of the study will be published in scientific journals. We will prepare a summary of the major findings and share it with their traditional institutions. We will also organize a workshop to disseminate the findings of the study to stakeholders. Community representatives, government representatives, and NGO representatives will be invited to the dissemination workshop.

**Who has approved this study?**

The study's ethical approval was provided by the University of Rwanda's ethical committee after reviewing the study protocol. The approval was presented to the health centers and local government for getting consent to conduct research in their respective facilities and areas.

**Who to Contact**

If you have any questions, you can ask them now or later. If you wish to ask questions later, you may contact the following: Mr Innocent MWISENEZA on Tel: +250788426985, e-mail:innocentmwiseneza@gmail.com.

**POST INTERVENTION INTERVIEW GUIDE**

**FOCUS GROUP DISCUSSION GUIDE-English version**

Good morning. My name is MWISENEZA Innocent. I am a PhD student at School of Public Health, University of Rwanda.

This focused group discussion is being conducted to get your inputs about the implemented CHWs-led MCI in supporting the control of HTN among hypertensive patients attending Selected Rwanda health centers. Where we are going to ask some questions that are related to “barriers and facilitators to CHWs-Led MCI to control HTN”.

I am especially interested in any inputs or suggestions which would help to improve the implemented MCI. If it is okay with you, I will be tape-recording our conversation. The purpose of this is so that I can get all the details but at the same time be able to carry on an attentive conversation with you. I assure you that all your comments will remain confidential. I will be compiling a report which will contain all participants’ comments without any reference to individuals. If you agree to this interview and the tape recording, please sign the consent form.

I'd like to start by having you briefly describe yourself. (To the interviewer: you may need to probe in order to get your information).

1. Please tell us your names, age, sex and your village?
2. Can you tells us about the carried out CHWs-led MCI? Do you consider the MCI important or less important towards it’s contribution in controlling HTN at the community level?
3. What would you consider as facilitators which intervened in carrying out this intervention? Would you consider it as successful or not ?(Probe the question)
4. What would you consider as barriers which would interfered during its implementation?
5. What else do you think can be done to make it more effective in future?

**FOR COMMUNITY HEALTH WORKERS (CHWS)**

1. Tell me about yourself (Your names, age, sex, function)?

2. Tell me about your involvement in the management of hypertension among uncontrolled hypertension patients at the community level? Particularly during this CHWs-led MCI, carried out?

3. Who have your efforts been focused on? Can you reach them easily?

4. What types of activities have you been involved in regarding management of HTN at the community level?

5. Do you think, as a community health worker your role plays a significant role in the management of uncontrolled HTN?

6. Since CHWs started to be involved in the management of uncontrolled HTN at the community level, did you see any factor that can be considered a facilitator to carry out this responsibility effectively?

7. Since you mentioned facilitators, what can be considered as barriers to CHWs for carrying out this important responsibility?

8. Do you have any other comments or suggestions for making this task shifting to be more effective in the future?

**FOR HYPERTENSIVE PATIENTS**

1. Tell me about yourself (Your names, age, sex, function)?

2. Tell me about your hypertension management at the community level by CHWs?

3. Do you consider the CHWs-led MCI, which has been administered by CHWs, important or less of important to you as a hypertensive patient?

4. What do you think would be considered as facilitators for this carried CHWs-led MCI on the side of CHWs? (Probe the question for more information)

5. What do you consider as barriers for this CHWs-led MCI to be carried out effectively, especially on the side of CHWs and HTN patients? (Probe the question)

6. Do you have suggestions or comments that would make this MCI more effective in managing uncontrolled hypertension at the community level?
